# Supplementary material
Source: PubMed Central journal article supplement (PMC3502905)
Supplement: AEM.02111-12_zam999103918so1.pdf [file AEM.02111-12_zam999103918so1.pdf]

## Supplementary Material for:

Fatty Acid Co-Substrates Provide  $\beta$ -Oxidation Precursors for Rhamnolipid Biosynthesis in *Pseudomonas aeruginosa*: Evidence from Isotope Tracing and Gene Expression

Lin Zhang, Tracey A. Veres-Schalnat, Arpad Somogyi, Jeanne E. Pemberton, and Raina M. Maier

Three isotopologues of Acetyl-CoA ( $d_0$ ,  $d_1$  and  $d_3$ ) and three isotopologues of malonyl-ACP ( $d_0$ ,  $d_1$  and  $d_2$ ) can theoretically be found in the *de novo* fatty acid synthesis substrate pool in the 1% glucose + 0.25% octadecanoic acid- $d_{35}$  treatment, if it is assumed that  $d_{35}$ -octadecanoic acid is completely degraded through  $\beta$ -oxidation and generates 9 acetyl-CoAs [8 acetyl-CoA ( $d_1$ ) and 1 acetyl-CoA ( $d_3$ )]:

- Acetyl-CoA ( $d_0$ ) is generated from the metabolism of glucose.
- Acetyl-CoAs ( $d_1$  and  $d_3$ ) are generated from the catabolism of  $d_{35}$ -octadecanoic acid through  $\beta$ -oxidation.
- Malonyl-ACP ( $d_0$ ) is formed by adding a molecule of bicarbonate with a molecule of either acetyl-CoA ( $d_0$ ) or acetyl-CoA ( $d_1$ ) following by a CoA: ACP transacylation reaction.
- Malonyl-ACP ( $d_1$ ) is formed by adding a molecule of bicarbonate with a molecule of acetyl-CoA ( $d_1$ ) following by a CoA: ACP transacylation reaction.
- Malonyl-ACP ( $d_2$ ) is formed by adding a molecule of bicarbonate with a molecule of acetyl-CoA ( $d_3$ ) following by a CoA: ACP transacylation reaction.

**Table S1** Isotope tracing results for the synthesis of (R)- $\beta$ -hydroxydecanoyl-ACP through de novo fatty acid synthesis pathway. “ $\times$ ” means that there is a chance to synthesize (R)- $\beta$ -hydroxydecanoyl-ACP ( $d_n$ ).

| Initial Cycle<br>(Cycle 1) |                          | Elongation Cycle         |                          |                          | (R)- $\beta$ -hydroxydecanoyl-ACP<br>( $d_n$ ) |          |          |          |          |       |       |       |       |
|----------------------------|--------------------------|--------------------------|--------------------------|--------------------------|------------------------------------------------|----------|----------|----------|----------|-------|-------|-------|-------|
| Acetyl-CoA<br>( $d_n$ )    | Malonyl-ACP<br>( $d_n$ ) | Malonyl-ACP<br>( $d_n$ ) | Malonyl-ACP<br>( $d_n$ ) | Malonyl-ACP<br>( $d_n$ ) | $d_0$                                          | $d_1$    | $d_2$    | $d_3$    | $d_4$    | $d_5$ | $d_6$ | $d_7$ | $d_8$ |
| $d_0$                      | $d_0$                    | $d_0$                    | $d_0$                    | $d_0$                    | $\times$                                       |          |          |          |          |       |       |       |       |
|                            |                          |                          |                          | $d_1$                    |                                                | $\times$ |          |          |          |       |       |       |       |
|                            |                          |                          |                          | $d_2$                    |                                                |          | $\times$ |          |          |       |       |       |       |
|                            |                          |                          | $d_1$                    | $d_0$                    | $\times$                                       | $\times$ |          |          |          |       |       |       |       |
|                            |                          |                          |                          | $d_1$                    |                                                | $\times$ | $\times$ |          |          |       |       |       |       |
|                            |                          |                          |                          | $d_2$                    |                                                |          | $\times$ | $\times$ |          |       |       |       |       |
|                            |                          |                          | $d_2$                    | $d_0$                    |                                                | $\times$ |          |          |          |       |       |       |       |
|                            |                          |                          |                          | $d_1$                    |                                                |          | $\times$ |          |          |       |       |       |       |
|                            |                          |                          |                          | $d_2$                    |                                                |          |          | $\times$ |          |       |       |       |       |
|                            |                          | $d_1$                    | $d_0$                    | $d_0$                    | $\times$                                       | $\times$ |          |          |          |       |       |       |       |
|                            |                          |                          |                          | $d_1$                    |                                                | $\times$ | $\times$ |          |          |       |       |       |       |
|                            |                          |                          |                          | $d_2$                    |                                                |          | $\times$ | $\times$ | $\times$ |       |       |       |       |
|                            |                          |                          | $d_1$                    | $d_0$                    | $\times$                                       | $\times$ | $\times$ |          |          |       |       |       |       |
|                            |                          |                          |                          | $d_1$                    |                                                | $\times$ | $\times$ | $\times$ |          |       |       |       |       |
|                            |                          |                          |                          | $d_2$                    |                                                |          | $\times$ | $\times$ | $\times$ |       |       |       |       |
|                            |                          |                          | $d_2$                    | $d_0$                    |                                                | $\times$ | $\times$ |          |          |       |       |       |       |
|                            |                          |                          |                          | $d_1$                    |                                                |          | $\times$ | $\times$ |          |       |       |       |       |
|                            |                          |                          |                          | $d_2$                    |                                                |          |          | $\times$ | $\times$ |       |       |       |       |

|  |       |       |       |       |   |   |   |   |   |   |  |  |  |
|--|-------|-------|-------|-------|---|---|---|---|---|---|--|--|--|
|  |       | $d_2$ | $d_0$ | $d_0$ |   | × |   |   |   |   |  |  |  |
|  |       |       |       | $d_1$ |   |   | × |   |   |   |  |  |  |
|  |       |       |       | $d_2$ |   |   |   | × |   |   |  |  |  |
|  |       |       | $d_1$ | $d_0$ |   | × | × |   |   |   |  |  |  |
|  |       |       |       | $d_1$ |   |   | × | × |   |   |  |  |  |
|  |       |       |       | $d_2$ |   |   |   | × | × |   |  |  |  |
|  |       |       | $d_2$ | $d_0$ |   |   | × |   |   |   |  |  |  |
|  |       |       |       | $d_1$ |   |   |   | × |   |   |  |  |  |
|  |       |       |       | $d_2$ |   |   |   |   | × |   |  |  |  |
|  | $d_1$ | $d_0$ | $d_0$ | $d_0$ | × | × |   |   |   |   |  |  |  |
|  |       |       |       | $d_1$ |   | × | × |   |   |   |  |  |  |
|  |       |       |       | $d_2$ |   |   | × | × |   |   |  |  |  |
|  |       |       | $d_1$ | $d_0$ | × | × | × |   |   |   |  |  |  |
|  |       |       |       | $d_1$ |   | × | × | × |   |   |  |  |  |
|  |       |       |       | $d_2$ |   |   | × | × | × |   |  |  |  |
|  |       |       | $d_2$ | $d_0$ |   | × | × |   |   |   |  |  |  |
|  |       |       |       | $d_1$ |   |   | × | × |   |   |  |  |  |
|  |       |       |       | $d_2$ |   |   |   | × | × |   |  |  |  |
|  |       | $d_1$ | $d_0$ | $d_0$ | × | × | × |   |   |   |  |  |  |
|  |       |       |       | $d_1$ |   | × | × | × |   |   |  |  |  |
|  |       |       |       | $d_2$ |   |   | × | × | × |   |  |  |  |
|  |       |       | $d_1$ | $d_0$ | × | × | × | × |   |   |  |  |  |
|  |       |       |       | $d_1$ |   | × | × | × | × |   |  |  |  |
|  |       |       |       | $d_2$ |   |   | × | × | × | × |  |  |  |
|  |       |       | $d_2$ | $d_0$ |   | × | × | × |   |   |  |  |  |
|  |       |       |       | $d_1$ |   |   | × | × | × |   |  |  |  |
|  |       |       |       | $d_2$ |   |   |   | × | × | × |  |  |  |

|  |       |       |       |       |  |   |   |   |   |   |   |  |  |
|--|-------|-------|-------|-------|--|---|---|---|---|---|---|--|--|
|  |       | $d_2$ | $d_0$ | $d_0$ |  | × | × |   |   |   |   |  |  |
|  |       |       |       | $d_1$ |  |   | × | × |   |   |   |  |  |
|  |       |       |       | $d_2$ |  |   |   | × | × |   |   |  |  |
|  |       |       | $d_1$ | $d_0$ |  | × | × | × |   |   |   |  |  |
|  |       |       |       | $d_1$ |  |   | × | × | × |   |   |  |  |
|  |       |       |       | $d_2$ |  |   |   | × | × | × |   |  |  |
|  |       |       | $d_2$ | $d_0$ |  |   | × | × |   |   |   |  |  |
|  |       |       |       | $d_1$ |  |   |   | × | × |   |   |  |  |
|  |       |       |       | $d_2$ |  |   |   |   | × | × |   |  |  |
|  | $d_2$ | $d_0$ | $d_0$ | $d_0$ |  | × |   |   |   |   |   |  |  |
|  |       |       |       | $d_1$ |  |   |   | × |   |   |   |  |  |
|  |       |       |       | $d_2$ |  |   |   |   | × |   |   |  |  |
|  |       |       | $d_1$ | $d_0$ |  | × | × |   |   |   |   |  |  |
|  |       |       |       | $d_1$ |  |   |   | × | × |   |   |  |  |
|  |       |       |       | $d_2$ |  |   |   |   | × | × |   |  |  |
|  |       |       | $d_2$ | $d_0$ |  |   |   | × |   |   |   |  |  |
|  |       |       |       | $d_1$ |  |   |   |   | × |   |   |  |  |
|  |       |       |       | $d_2$ |  |   |   |   |   | × |   |  |  |
|  |       | $d_1$ | $d_0$ | $d_0$ |  | × | × |   |   |   |   |  |  |
|  |       |       |       | $d_1$ |  |   |   | × | × |   |   |  |  |
|  |       |       |       | $d_2$ |  |   |   |   | × | × |   |  |  |
|  |       |       | $d_1$ | $d_0$ |  | × | × | × |   |   |   |  |  |
|  |       |       |       | $d_1$ |  |   |   | × | × | × |   |  |  |
|  |       |       |       | $d_2$ |  |   |   |   | × | × | × |  |  |
|  |       |       | $d_2$ | $d_0$ |  |   |   | × | × |   |   |  |  |
|  |       |       |       | $d_1$ |  |   |   |   | × | × |   |  |  |
|  |       |       |       | $d_2$ |  |   |   |   |   | × | × |  |  |

|       |       |       |       |       |  |          |          |          |          |          |  |  |  |
|-------|-------|-------|-------|-------|--|----------|----------|----------|----------|----------|--|--|--|
|       |       | $d_2$ | $d_0$ | $d_0$ |  |          | $\times$ |          |          |          |  |  |  |
|       |       |       |       | $d_1$ |  |          |          | $\times$ |          |          |  |  |  |
|       |       |       |       | $d_2$ |  |          |          |          | $\times$ |          |  |  |  |
|       |       |       | $d_1$ | $d_0$ |  |          | $\times$ | $\times$ |          |          |  |  |  |
|       |       |       |       | $d_1$ |  |          |          | $\times$ | $\times$ |          |  |  |  |
|       |       |       |       | $d_2$ |  |          |          |          | $\times$ | $\times$ |  |  |  |
|       |       |       | $d_2$ | $d_0$ |  |          |          | $\times$ |          |          |  |  |  |
|       |       |       |       | $d_1$ |  |          |          |          | $\times$ |          |  |  |  |
|       |       |       |       | $d_2$ |  |          |          |          |          | $\times$ |  |  |  |
| $d_1$ | $d_0$ | $d_0$ | $d_0$ | $d_0$ |  | $\times$ |          |          |          |          |  |  |  |
|       |       |       |       | $d_1$ |  |          | $\times$ |          |          |          |  |  |  |
|       |       |       |       | $d_2$ |  |          |          | $\times$ |          |          |  |  |  |
|       |       |       | $d_1$ | $d_0$ |  | $\times$ | $\times$ |          |          |          |  |  |  |
|       |       |       |       | $d_1$ |  |          | $\times$ | $\times$ |          |          |  |  |  |
|       |       |       |       | $d_2$ |  |          |          | $\times$ | $\times$ |          |  |  |  |
|       |       |       | $d_2$ | $d_0$ |  |          | $\times$ |          |          |          |  |  |  |
|       |       |       |       | $d_1$ |  |          |          | $\times$ |          |          |  |  |  |
|       |       |       |       | $d_2$ |  |          |          |          | $\times$ |          |  |  |  |
|       |       | $d_1$ | $d_0$ | $d_0$ |  | $\times$ | $\times$ |          |          |          |  |  |  |
|       |       |       |       | $d_1$ |  |          | $\times$ | $\times$ |          |          |  |  |  |
|       |       |       |       | $d_2$ |  |          |          | $\times$ | $\times$ |          |  |  |  |
|       |       |       | $d_1$ | $d_0$ |  | $\times$ | $\times$ | $\times$ |          |          |  |  |  |
|       |       |       |       | $d_1$ |  |          | $\times$ | $\times$ | $\times$ |          |  |  |  |
|       |       |       |       | $d_2$ |  |          |          | $\times$ | $\times$ | $\times$ |  |  |  |
|       |       |       | $d_2$ | $d_0$ |  |          | $\times$ | $\times$ |          |          |  |  |  |
|       |       |       |       | $d_1$ |  |          |          | $\times$ | $\times$ |          |  |  |  |
|       |       |       |       | $d_2$ |  |          |          |          | $\times$ | $\times$ |  |  |  |

|  |       |       |       |       |  |          |          |          |          |          |          |          |  |
|--|-------|-------|-------|-------|--|----------|----------|----------|----------|----------|----------|----------|--|
|  |       | $d_2$ | $d_0$ | $d_0$ |  |          | $\times$ |          |          |          |          |          |  |
|  |       |       |       | $d_1$ |  |          |          | $\times$ |          |          |          |          |  |
|  |       |       |       | $d_2$ |  |          |          |          | $\times$ |          |          |          |  |
|  |       |       | $d_1$ | $d_0$ |  |          | $\times$ | $\times$ |          |          |          |          |  |
|  |       |       |       | $d_1$ |  |          |          | $\times$ | $\times$ |          |          |          |  |
|  |       |       |       | $d_2$ |  |          |          |          | $\times$ | $\times$ |          |          |  |
|  |       |       | $d_2$ | $d_0$ |  |          |          | $\times$ |          |          |          |          |  |
|  |       |       |       | $d_1$ |  |          |          |          | $\times$ |          |          |          |  |
|  |       |       |       | $d_2$ |  |          |          |          |          | $\times$ |          |          |  |
|  | $d_1$ | $d_0$ | $d_0$ | $d_0$ |  | $\times$ | $\times$ |          |          |          |          |          |  |
|  |       |       |       | $d_1$ |  |          | $\times$ | $\times$ |          |          |          |          |  |
|  |       |       |       | $d_2$ |  |          |          | $\times$ | $\times$ |          |          |          |  |
|  |       |       | $d_1$ | $d_0$ |  | $\times$ | $\times$ | $\times$ |          |          |          |          |  |
|  |       |       |       | $d_1$ |  |          | $\times$ | $\times$ | $\times$ |          |          |          |  |
|  |       |       |       | $d_2$ |  |          |          | $\times$ | $\times$ | $\times$ |          |          |  |
|  |       |       | $d_2$ | $d_0$ |  |          | $\times$ | $\times$ |          |          |          |          |  |
|  |       |       |       | $d_1$ |  |          |          | $\times$ | $\times$ |          |          |          |  |
|  |       |       |       | $d_2$ |  |          |          |          | $\times$ | $\times$ |          |          |  |
|  |       | $d_1$ | $d_0$ | $d_0$ |  | $\times$ | $\times$ | $\times$ |          |          |          |          |  |
|  |       |       |       | $d_1$ |  |          | $\times$ | $\times$ | $\times$ | $\times$ |          |          |  |
|  |       |       |       | $d_2$ |  |          |          | $\times$ | $\times$ | $\times$ | $\times$ |          |  |
|  |       |       | $d_1$ | $d_0$ |  | $\times$ | $\times$ | $\times$ | $\times$ |          |          |          |  |
|  |       |       |       | $d_1$ |  |          | $\times$ | $\times$ | $\times$ | $\times$ |          |          |  |
|  |       |       |       | $d_2$ |  |          |          | $\times$ | $\times$ | $\times$ | $\times$ | $\times$ |  |
|  |       |       | $d_2$ | $d_0$ |  |          | $\times$ | $\times$ | $\times$ |          |          |          |  |
|  |       |       |       | $d_1$ |  |          |          | $\times$ | $\times$ | $\times$ |          |          |  |
|  |       |       |       | $d_2$ |  |          |          |          | $\times$ | $\times$ | $\times$ |          |  |

|  |       |       |       |       |  |  |   |   |   |   |   |  |  |
|--|-------|-------|-------|-------|--|--|---|---|---|---|---|--|--|
|  |       | $d_2$ | $d_0$ | $d_0$ |  |  | × | × |   |   |   |  |  |
|  |       |       |       | $d_1$ |  |  |   | × | × |   |   |  |  |
|  |       |       |       | $d_2$ |  |  |   |   | × | × |   |  |  |
|  |       |       | $d_1$ | $d_0$ |  |  | × | × | × |   |   |  |  |
|  |       |       |       | $d_1$ |  |  |   | × | × | × |   |  |  |
|  |       |       |       | $d_2$ |  |  |   |   | × | × | × |  |  |
|  |       |       | $d_2$ | $d_0$ |  |  |   | × | × |   |   |  |  |
|  |       |       |       | $d_1$ |  |  |   |   | × | × |   |  |  |
|  |       |       |       | $d_2$ |  |  |   |   |   | × | × |  |  |
|  | $d_2$ | $d_0$ | $d_0$ | $d_0$ |  |  | × |   |   |   |   |  |  |
|  |       |       |       | $d_1$ |  |  |   | × |   |   |   |  |  |
|  |       |       |       | $d_2$ |  |  |   |   | × |   |   |  |  |
|  |       |       | $d_1$ | $d_0$ |  |  | × | × |   |   |   |  |  |
|  |       |       |       | $d_1$ |  |  |   | × | × |   |   |  |  |
|  |       |       |       | $d_2$ |  |  |   |   | × | × |   |  |  |
|  |       |       | $d_2$ | $d_0$ |  |  |   | × |   |   |   |  |  |
|  |       |       |       | $d_1$ |  |  |   |   | × |   |   |  |  |
|  |       |       |       | $d_2$ |  |  |   |   |   | × |   |  |  |
|  |       | $d_1$ | $d_0$ | $d_0$ |  |  | × | × |   |   |   |  |  |
|  |       |       |       | $d_1$ |  |  |   | × | × |   |   |  |  |
|  |       |       |       | $d_2$ |  |  |   |   | × | × |   |  |  |
|  |       |       | $d_1$ | $d_0$ |  |  | × | × | × |   |   |  |  |
|  |       |       |       | $d_1$ |  |  |   | × | × | × |   |  |  |
|  |       |       |       | $d_2$ |  |  |   |   | × | × | × |  |  |
|  |       |       | $d_2$ | $d_0$ |  |  |   | × | × |   |   |  |  |
|  |       |       |       | $d_1$ |  |  |   |   | × | × |   |  |  |
|  |       |       |       | $d_2$ |  |  |   |   |   | × | × |  |  |

|       |       |       |       |       |  |  |  |  |          |          |          |          |          |  |
|-------|-------|-------|-------|-------|--|--|--|--|----------|----------|----------|----------|----------|--|
|       |       | $d_2$ | $d_0$ | $d_0$ |  |  |  |  | $\times$ |          |          |          |          |  |
|       |       |       |       | $d_1$ |  |  |  |  |          | $\times$ |          |          |          |  |
|       |       |       |       | $d_2$ |  |  |  |  |          |          | $\times$ |          |          |  |
|       |       |       | $d_1$ | $d_0$ |  |  |  |  | $\times$ | $\times$ |          |          |          |  |
|       |       |       |       | $d_1$ |  |  |  |  |          | $\times$ | $\times$ |          |          |  |
|       |       |       |       | $d_2$ |  |  |  |  |          |          | $\times$ | $\times$ |          |  |
|       |       |       | $d_2$ | $d_0$ |  |  |  |  |          | $\times$ |          |          |          |  |
|       |       |       |       | $d_1$ |  |  |  |  |          |          | $\times$ |          |          |  |
|       |       |       |       | $d_2$ |  |  |  |  |          |          |          | $\times$ |          |  |
| $d_3$ | $d_0$ | $d_0$ | $d_0$ | $d_0$ |  |  |  |  | $\times$ |          |          |          |          |  |
|       |       |       |       | $d_1$ |  |  |  |  |          | $\times$ |          |          |          |  |
|       |       |       |       | $d_2$ |  |  |  |  |          |          | $\times$ |          |          |  |
|       |       |       | $d_1$ | $d_0$ |  |  |  |  | $\times$ | $\times$ |          |          |          |  |
|       |       |       |       | $d_1$ |  |  |  |  |          | $\times$ | $\times$ |          |          |  |
|       |       |       |       | $d_2$ |  |  |  |  |          |          | $\times$ | $\times$ |          |  |
|       |       |       | $d_2$ | $d_0$ |  |  |  |  |          | $\times$ |          |          |          |  |
|       |       |       |       | $d_1$ |  |  |  |  |          |          | $\times$ |          |          |  |
|       |       |       |       | $d_2$ |  |  |  |  |          |          |          | $\times$ |          |  |
|       |       | $d_1$ | $d_0$ | $d_0$ |  |  |  |  | $\times$ | $\times$ |          |          |          |  |
|       |       |       |       | $d_1$ |  |  |  |  |          | $\times$ | $\times$ |          |          |  |
|       |       |       |       | $d_2$ |  |  |  |  |          |          | $\times$ | $\times$ |          |  |
|       |       |       | $d_1$ | $d_0$ |  |  |  |  | $\times$ | $\times$ | $\times$ |          |          |  |
|       |       |       |       | $d_1$ |  |  |  |  |          | $\times$ | $\times$ | $\times$ |          |  |
|       |       |       |       | $d_2$ |  |  |  |  |          |          | $\times$ | $\times$ | $\times$ |  |
|       |       |       | $d_2$ | $d_0$ |  |  |  |  |          | $\times$ | $\times$ |          |          |  |
|       |       |       |       | $d_1$ |  |  |  |  |          |          | $\times$ | $\times$ |          |  |
|       |       |       |       | $d_2$ |  |  |  |  |          |          |          | $\times$ | $\times$ |  |



|  |       |       |       |       |  |  |  |          |          |          |          |          |          |  |
|--|-------|-------|-------|-------|--|--|--|----------|----------|----------|----------|----------|----------|--|
|  |       | $d_2$ | $d_0$ | $d_0$ |  |  |  |          |          | $\times$ |          |          |          |  |
|  |       |       |       | $d_1$ |  |  |  |          |          |          | $\times$ |          |          |  |
|  |       |       |       | $d_2$ |  |  |  |          |          |          |          | $\times$ |          |  |
|  |       |       | $d_1$ | $d_0$ |  |  |  |          | $\times$ | $\times$ |          |          |          |  |
|  |       |       |       | $d_1$ |  |  |  |          |          | $\times$ | $\times$ |          |          |  |
|  |       |       |       | $d_2$ |  |  |  |          |          |          |          | $\times$ | $\times$ |  |
|  |       |       | $d_2$ | $d_0$ |  |  |  |          |          | $\times$ |          |          |          |  |
|  |       |       |       | $d_1$ |  |  |  |          |          |          |          | $\times$ |          |  |
|  |       |       |       | $d_2$ |  |  |  |          |          |          |          |          | $\times$ |  |
|  | $d_1$ | $d_0$ | $d_0$ | $d_0$ |  |  |  | $\times$ | $\times$ |          |          |          |          |  |
|  |       |       |       | $d_1$ |  |  |  |          | $\times$ | $\times$ |          |          |          |  |
|  |       |       |       | $d_2$ |  |  |  |          |          | $\times$ | $\times$ |          |          |  |
|  |       |       | $d_1$ | $d_0$ |  |  |  | $\times$ | $\times$ | $\times$ |          |          |          |  |
|  |       |       |       | $d_1$ |  |  |  |          | $\times$ | $\times$ | $\times$ |          |          |  |
|  |       |       |       | $d_2$ |  |  |  |          |          | $\times$ | $\times$ | $\times$ |          |  |
|  |       |       | $d_2$ | $d_0$ |  |  |  |          | $\times$ | $\times$ |          |          |          |  |
|  |       |       |       | $d_1$ |  |  |  |          |          | $\times$ | $\times$ |          |          |  |
|  |       |       |       | $d_2$ |  |  |  |          |          |          | $\times$ | $\times$ | $\times$ |  |
|  |       | $d_1$ | $d_0$ | $d_0$ |  |  |  | $\times$ | $\times$ | $\times$ | $\times$ |          |          |  |
|  |       |       |       | $d_1$ |  |  |  |          | $\times$ | $\times$ | $\times$ | $\times$ |          |  |
|  |       |       |       | $d_2$ |  |  |  |          |          | $\times$ | $\times$ | $\times$ | $\times$ |  |
|  |       |       | $d_2$ | $d_0$ |  |  |  |          | $\times$ | $\times$ | $\times$ |          |          |  |
|  |       |       |       | $d_1$ |  |  |  |          |          | $\times$ | $\times$ | $\times$ |          |  |
|  |       |       |       | $d_2$ |  |  |  |          |          |          | $\times$ | $\times$ | $\times$ |  |

|  |       |       |       |       |  |  |  |  |  |          |          |          |          |          |
|--|-------|-------|-------|-------|--|--|--|--|--|----------|----------|----------|----------|----------|
|  |       | $d_2$ | $d_0$ | $d_0$ |  |  |  |  |  | $\times$ | $\times$ |          |          |          |
|  |       |       |       | $d_1$ |  |  |  |  |  |          | $\times$ | $\times$ |          |          |
|  |       |       |       | $d_2$ |  |  |  |  |  |          |          | $\times$ | $\times$ |          |
|  |       |       | $d_1$ | $d_0$ |  |  |  |  |  | $\times$ | $\times$ | $\times$ |          |          |
|  |       |       |       | $d_1$ |  |  |  |  |  |          | $\times$ | $\times$ | $\times$ |          |
|  |       |       |       | $d_2$ |  |  |  |  |  |          |          | $\times$ | $\times$ | $\times$ |
|  |       |       | $d_2$ | $d_0$ |  |  |  |  |  |          | $\times$ | $\times$ |          |          |
|  |       |       |       | $d_1$ |  |  |  |  |  |          |          | $\times$ | $\times$ |          |
|  |       |       |       | $d_2$ |  |  |  |  |  |          |          |          | $\times$ | $\times$ |
|  | $d_2$ | $d_0$ | $d_0$ | $d_0$ |  |  |  |  |  | $\times$ |          |          |          |          |
|  |       |       |       | $d_1$ |  |  |  |  |  |          | $\times$ |          |          |          |
|  |       |       |       | $d_2$ |  |  |  |  |  |          |          | $\times$ |          |          |
|  |       |       | $d_1$ | $d_0$ |  |  |  |  |  | $\times$ | $\times$ |          |          |          |
|  |       |       |       | $d_1$ |  |  |  |  |  |          | $\times$ | $\times$ |          |          |
|  |       |       |       | $d_2$ |  |  |  |  |  |          |          | $\times$ | $\times$ |          |
|  |       |       | $d_2$ | $d_0$ |  |  |  |  |  |          | $\times$ |          |          |          |
|  |       |       |       | $d_1$ |  |  |  |  |  |          |          | $\times$ |          |          |
|  |       |       |       | $d_2$ |  |  |  |  |  |          |          |          | $\times$ |          |
|  |       | $d_1$ | $d_0$ | $d_0$ |  |  |  |  |  | $\times$ | $\times$ |          |          |          |
|  |       |       |       | $d_1$ |  |  |  |  |  |          | $\times$ | $\times$ |          |          |
|  |       |       |       | $d_2$ |  |  |  |  |  |          |          | $\times$ | $\times$ |          |
|  |       |       | $d_1$ | $d_0$ |  |  |  |  |  | $\times$ | $\times$ | $\times$ |          |          |
|  |       |       |       | $d_1$ |  |  |  |  |  |          | $\times$ | $\times$ | $\times$ |          |
|  |       |       |       | $d_2$ |  |  |  |  |  |          |          | $\times$ | $\times$ | $\times$ |
|  |       |       | $d_2$ | $d_0$ |  |  |  |  |  |          | $\times$ | $\times$ |          |          |
|  |       |       |       | $d_1$ |  |  |  |  |  |          |          | $\times$ | $\times$ |          |
|  |       |       |       | $d_2$ |  |  |  |  |  |          |          |          | $\times$ | $\times$ |

|  |  |                |                |                |  |  |  |  |  |   |   |   |   |   |
|--|--|----------------|----------------|----------------|--|--|--|--|--|---|---|---|---|---|
|  |  | d <sub>2</sub> | d <sub>0</sub> | d <sub>0</sub> |  |  |  |  |  |   | × |   |   |   |
|  |  |                |                | d <sub>1</sub> |  |  |  |  |  |   |   | × |   |   |
|  |  |                |                | d <sub>2</sub> |  |  |  |  |  |   |   |   | × |   |
|  |  |                | d <sub>1</sub> | d <sub>0</sub> |  |  |  |  |  | × | × |   |   |   |
|  |  |                |                | d <sub>1</sub> |  |  |  |  |  |   | × | × |   |   |
|  |  |                |                | d <sub>2</sub> |  |  |  |  |  |   |   |   | × | × |
|  |  |                | d <sub>2</sub> | d <sub>0</sub> |  |  |  |  |  |   | × |   |   |   |
|  |  |                |                | d <sub>1</sub> |  |  |  |  |  |   |   |   | × |   |
|  |  |                |                | d <sub>2</sub> |  |  |  |  |  |   |   |   |   | × |

**Table S2** Possibility of producing (R)- $\beta$ -hydroxydecanoyl-ACP (d<sub>n</sub>) through *de novo* fatty acid synthesis, based on the assumption that all possible reactions in the *de novo* cycles have the same chance to happen.

| (R)- $\beta$ -hydroxydecanoyl-ACP (d <sub>n</sub> ) | d <sub>0</sub> | d <sub>1</sub> | d <sub>2</sub> | d <sub>3</sub> | d <sub>4</sub> | d <sub>5</sub> | d <sub>6</sub> | d <sub>7</sub> | d <sub>8</sub> |
|-----------------------------------------------------|----------------|----------------|----------------|----------------|----------------|----------------|----------------|----------------|----------------|
| Number of Ways                                      | 8              | 35             | 73             | 100            | 100            | 81             | 54             | 27             | 8              |
| Possibility (%)                                     | 1.6            | 7.2            | 15.0           | 20.6           | 20.6           | 16.7           | 11.1           | 5.6            | 1.6            |

**Table S3** Intermediates (chain length and deuteration) of octadecanoic acid- $d_{35}$   $\beta$ -oxidation and acetyl-CoAs ( $d_n$ ) produced

| $\beta$ -oxidation cycle | Acyl-CoA ( $d_n$ )                 | Trans-2,3-enoyl-CoA ( $d_n$ )      | S- $\beta$ -hydroxyacyl-CoA ( $d_n$ ) | $\beta$ -ketoacyl-CoA ( $d_n$ )    | Acetyl-CoA ( $d_n$ )                                                     |
|--------------------------|------------------------------------|------------------------------------|---------------------------------------|------------------------------------|--------------------------------------------------------------------------|
| Cycle 1                  | C <sub>18</sub> (d <sub>35</sub> ) | C <sub>18</sub> (d <sub>33</sub> ) | C <sub>18</sub> (d <sub>33</sub> )    | C <sub>18</sub> (d <sub>32</sub> ) | C <sub>2</sub> (d <sub>1</sub> )                                         |
| Cycle 2                  | C <sub>16</sub> (d <sub>31</sub> ) | C <sub>16</sub> (d <sub>29</sub> ) | C <sub>16</sub> (d <sub>29</sub> )    | C <sub>16</sub> (d <sub>28</sub> ) | C <sub>2</sub> (d <sub>1</sub> )                                         |
| Cycle 3                  | C <sub>14</sub> (d <sub>27</sub> ) | C <sub>14</sub> (d <sub>25</sub> ) | C <sub>14</sub> (d <sub>25</sub> )    | C <sub>14</sub> (d <sub>24</sub> ) | C <sub>2</sub> (d <sub>1</sub> )                                         |
| Cycle 4                  | C <sub>12</sub> (d <sub>23</sub> ) | C <sub>12</sub> (d <sub>21</sub> ) | C <sub>12</sub> (d <sub>21</sub> )    | C <sub>12</sub> (d <sub>20</sub> ) | C <sub>2</sub> (d <sub>1</sub> )                                         |
| Cycle 5                  | C <sub>10</sub> (d <sub>19</sub> ) | C <sub>10</sub> (d <sub>17</sub> ) | C <sub>10</sub> (d <sub>17</sub> )    | C <sub>10</sub> (d <sub>16</sub> ) | C <sub>2</sub> (d <sub>1</sub> )                                         |
| Cycle 6                  | C <sub>8</sub> (d <sub>15</sub> )  | C <sub>8</sub> (d <sub>13</sub> )  | C <sub>8</sub> (d <sub>13</sub> )     | C <sub>8</sub> (d <sub>12</sub> )  | C <sub>2</sub> (d <sub>1</sub> )                                         |
| Cycle 7                  | C <sub>6</sub> (d <sub>11</sub> )  | C <sub>6</sub> (d <sub>9</sub> )   | C <sub>6</sub> (d <sub>9</sub> )      | C <sub>6</sub> (d <sub>8</sub> )   | C <sub>2</sub> (d <sub>1</sub> )                                         |
| Cycle 8                  | C <sub>4</sub> (d <sub>7</sub> )   | C <sub>4</sub> (d <sub>5</sub> )   | C <sub>4</sub> (d <sub>5</sub> )      | C <sub>4</sub> (d <sub>4</sub> )   | C <sub>2</sub> (d <sub>1</sub> ) and<br>C <sub>2</sub> (d <sub>3</sub> ) |
